# Supplementary material for: Respiratory Symptoms in Post-infancy Children. A Dutch Pediatric Cohort Study
Source: PubMed Central journal article supplement (PMC7773946; doi:10.3389/fped.2020.583630), 2020-12-17
Supplement: Table_1.pdf [file Table_1.pdf]

**Supplementary Table 1. Selected population studies on respiratory symptoms in children**

| PMID <sup>1</sup> | Ref <sup>2</sup> | Country                          | Population                                                                                                | Period (yrs)                             | Period (FU)                       | Age                           | Number                        | Methods                                                                                                                          | Results                                                                                                                                                                                                                                                                                                        |
|-------------------|------------------|----------------------------------|-----------------------------------------------------------------------------------------------------------|------------------------------------------|-----------------------------------|-------------------------------|-------------------------------|----------------------------------------------------------------------------------------------------------------------------------|----------------------------------------------------------------------------------------------------------------------------------------------------------------------------------------------------------------------------------------------------------------------------------------------------------------|
|                   |                  | <i>where study was performed</i> | <i>where cohort was recruited</i>                                                                         | <i>in which the cohort was recruited</i> | <i>of follow-up of the cohort</i> | <i>of cohort participants</i> | <i>of cohort participants</i> | <i>cohort selection; data collection; perspective (parents or professionals)</i>                                                 | <i>summary of reported respiratory symptoms</i>                                                                                                                                                                                                                                                                |
| 2732519           | 6                | USA                              | Large city, children <3 ms at 1st visit to two separate pediatric practices (1 urban, 1 private suburban) | 1975-1977                                | 1-7 yrs                           | 0-7 yrs                       | 877                           | Predefined parental questionnaires at each pediatric visit, regardless of its primary purpose                                    | At 1 yr of age, 62% had $\geq 1$ otitis media episode, 17% had $\geq 3$ episodes; by 3 yrs of age, 83% had $\geq 1$ episode, 46% had $\geq 3$ episodes; peak incidence was during 6-12 ms of life (increased risk for males, siblings with recurrent otitis, early occurrence of otitis, not being breast fed) |
| 2729259           | 7                | USA                              | Large city, pediatric health organisation                                                                 | 1980-1984                                | 1 yr                              | 0-1 yrs                       | 1179                          | Active recording of symptoms during doctor visits                                                                                | 32.88% doctor visit for resp illness; 60% of lower resp infection was bronchiolitis                                                                                                                                                                                                                            |
| 9604409           | 8                | Netherlands                      | Nationwide, 161 GP practices, 100 children per practice, 70% of selected families participated            | 1987-1988                                | 3 wks                             | 0-14 yrs                      | 1805                          | Randomly selected; diary, structured questionnaire parents, phone calls; all seasons included (primary study endpoint 'illness') | Common colds, flu-like and airway symptoms were most frequent, especially in young children, and in autumn and winter. 60% had symptoms during the 3 weeks of FU, 1 in 6 of these visited their GP                                                                                                             |
| 7702884           | 9                | UK                               | Mixed urban and rural area, birth cohort from two neighbouring general practices                          | 1987-1989                                | 2 yrs                             | 0-2 yrs                       | 333                           | Diary parents (11,500 childdays of observation)                                                                                  | Prevalence of cold, snuffles or sneezing 9.5/100 child days of observation (increased risk with siblings in the family).                                                                                                                                                                                       |

|          |    |           |                                                       |           |       |                                |                            |                                                                                                                                       |                                                                                                                                                                                                                               |
|----------|----|-----------|-------------------------------------------------------|-----------|-------|--------------------------------|----------------------------|---------------------------------------------------------------------------------------------------------------------------------------|-------------------------------------------------------------------------------------------------------------------------------------------------------------------------------------------------------------------------------|
| 10353923 | 10 | USA       | Large city, outpatient clinic for pregnant women      | 1991-1994 | 6 ms  | 0-6 ms                         | 596                        | Monthly structured questionnaire parents (primary study endpoint otitis media)                                                        | Focus on risk factors influencing frequency and early occurrence of otitis media (day care, airway infections, family size & history, and season identified as such)                                                          |
| 11031406 | 11 | Norway    | Large city, national census registry                  | 1996      | n.a.  | 0-5 yrs                        | 3754                       | Single structured questionnaire parents; retrospective ('last month' and 'last year')                                                 | Focus on risk factors for airway infections (atopy, low birth weight, day care, family size, age, season identified as such)                                                                                                  |
| 29447878 | 12 | Denmark   | National birth cohort, 30% of the eligible population | 1996-2002 | 7 yrs | 0-7 yrs                        | 54,549 (post-natal cohort) | Telephone interview at 12 & 30 wks of pregnancy, and at 6 & 18ms of age; questionnaire at 7 yrs of age                                | Focus on otitis media, 40% $\geq 1$ 10% $>3$ episodes at 18ms, 24% $>3$ episodes at 7 yrs; increased risk multiple episodes with short breastfeeding & early daycare                                                          |
| 14703301 | 13 | Australia | Large city                                            | 1997-1998 | 15 ms | all ages (children and adults) | 1460                       | Weekly structured questionnaire parents (primary study endpoint gastroenteritis) (childweeks of observation not separately described) | Focus on gastroenteritis related to water supply. $\geq 80\%$ reported $\geq 1$ resp episode in 15ms; average 2.2 episodes/person/ yr, duration 6.3 days; more episodes in younger children; doctor visit for 1 in 4 episodes |
| 19159954 | 14 | Germany   | Four large cities, birth cohort                       | 1997-2005 | 6 yrs | 0-6 yrs                        | 3097                       | Monthly questionnaires parents                                                                                                        | 66.7% $\geq 1$ otitis media episode, 13.5% $\geq 1$ pneumonia episode in 6 yrs, peak in 2nd yr, influence of season and gender; half had antibiotics for otitis in 1st yr                                                     |
| 21886448 | 15 | Canada    | Large region, health registries                       | 1999-2000 | 3 ys  | 0-3 yrs                        | 50474                      | Linking of health registry data, doctor visit data                                                                                    | 48.6% $\geq 1$ doctor visits for otitis media, highest incidence in 1st & 2nd yr; influence by family and social factors                                                                                                      |

|          |    |             |                                                                               |                   |       |          |        |                                                                                                                                      |                                                                                                                                                                                                                                                                                                                                      |
|----------|----|-------------|-------------------------------------------------------------------------------|-------------------|-------|----------|--------|--------------------------------------------------------------------------------------------------------------------------------------|--------------------------------------------------------------------------------------------------------------------------------------------------------------------------------------------------------------------------------------------------------------------------------------------------------------------------------------|
| 17123315 | 16 | Switzerland | Large city, maternity hospitals & obstetrician's practices, BILD birth cohort | 1999-2005         | 1 yr  | 0-1 yrs  | 195    | Weekly phone calls (10,275 childweeks of observation)                                                                                | ≥1 resp episode in 46% (severe) and 93% (all) children, in 9.9% of person-weeks; 90% had symptoms in ≤12 wks                                                                                                                                                                                                                         |
| 30474038 | 17 | Switzerland | Large city, maternity hospitals & obstetrician's practices, BILD birth cohort | 1999-2015         | 6 yrs | 0-6 yrs  | 369    | Weekly telephone interview in 1 <sup>st</sup> year of life on respiratory symptoms and infections (16,864 childweeks of observation) | Low, intermediate and high risk phenotype of symptom dynamics in 1 <sup>st</sup> yr of life, high risk phenotype increased risk of wheezing at 6 yrs (OR 3.01)                                                                                                                                                                       |
| 15790323 | 18 | Australia   | Large city                                                                    | 2001              | 5 ms  | 12-71 ms | 118    | Diary parents, phone calls (477,3 childmonths of observation)                                                                        | 0.53 resp episode/chld-month; risk factors age, family size, day care; doctor visit for 1 in 2, antibiotics for 1 in 5 episodes                                                                                                                                                                                                      |
| 17667308 | 19 | Netherlands | New residential area, suburb of large city, birth cohort                      | from 2001 onwards | 1 yr  | 0-1 yrs  | 687    | Diary parents, linked to general practitioner's electronic patient file (childdays of observation not explicitly described)          | Average 64.4 ± 60.9SD days with resp symptoms/yr, 47% ≥1 doctor visit for resp symptoms; influenced by child as well as parent characteristics                                                                                                                                                                                       |
| 21591837 | 20 | Netherlands | Retrospective analysis in Netherlands Information Network of General Practice | 2002-2008         | 6 yrs | 0-17 yrs | 50,000 | Incidence rates based on diagnosis codes reported by GPs                                                                             | 0.2% sinusitis, 1.5% AOM, 2.5% serous otitis, tonsillitis, tonsillar hypertrophy incidence age 0-4 yrs; antibiotics in 60% of sinusitis and tonsillitis, 50% AOM, tonsillar hypertrophy 20%, serous otitis 9%; in 90% amoxicillin; referral to ENT surgeon in 1% for sinusitis and 30% for tonsillar hypertrophy, mainly age 0-4 yrs |

|          |    |             |                                                                                     |                   |        |                    |                                         |                                                                                                                                                                    |                                                                                                                                                                                                                                                 |
|----------|----|-------------|-------------------------------------------------------------------------------------|-------------------|--------|--------------------|-----------------------------------------|--------------------------------------------------------------------------------------------------------------------------------------------------------------------|-------------------------------------------------------------------------------------------------------------------------------------------------------------------------------------------------------------------------------------------------|
| 30804033 | 21 | Australia   | Retrospective analysis of ED records in Western Australia                           | 2002-2012         | 10 yrs | 0-16 yrs           | 1.6m Emergency Department presentations | Emergency Department data linked to birth cohort data set                                                                                                          | 26% of ED presentations for RTI (n=418,755), <5 yrs 32% for RTI (n=332 149); 90,421 with repeat RTI presentations (range 1-85x)                                                                                                                 |
| 18435478 | 22 | Denmark     | Large city, maternity ward                                                          | 2004-2006         | 1 yr   | 0-12 ms            | 228                                     | Inclusion of 20 children per month; structured diary parents, monthly home visit (80,013 chiddays of observation)                                                  | Resp symptoms 20% of days 0-6 ms, 30% 6-9 ms, 40% 9-12 ms; nasal discharge and cough most prevalent; 83% of children $\geq 1$ doctor visit. risk factors age, season, size of household and residence, day care, family size                    |
| 25849847 | 23 | Netherlands | New residential area, suburb of large city, birth cohort                            | from 2008 onwards | 12 ms  | 0-2 up to 12-14 ms | 1260                                    | Diary parents, linked to general practitioner's electronic patient file (1,029 childyears of observation)                                                          | Focus on otitis media (fever + $\geq 1$ ear pain, ear discharge); 32% $\geq 1$ episode in 1st yr; doctor visit in 82% episodes, antibiotics in 88% of these                                                                                     |
| 30126046 | 24 | Finland     | Birth cohort, maternity health care clinics or delivery wards in south-west Finland | 2008-2010         | 2 yrs  | 0-2 yrs            | 646                                     | Daily diary, study clinic visits during RTIs and AOM; MacArthur Communicative Development Inventory, 13 & 24 ms (chiddays of observation not explicitly described) | 9.6% had recurrent respiratory tract infections and 9.9% had recurrent acute otitis media; sociodemographic data were associated with vocabulary development and with the prevalence of recurrent RTIs and AOM                                  |
| 27455443 | 25 | Finland     | Birth cohort, maternity health care clinics or delivery wards in south-west Finland | 2008-2010         | 2 yrs  | 0-2 yrs            | 1089                                    | Daily diary, study clinic visits during RTIs and AOM; nasal swabs during RTI in 714 children                                                                       | p90 in number of annual respiratory illness days = 98; >p90 (n=109) median of 9.6 acute RTI per year, 60% of them $\geq 3$ AOM, 70% $\geq 3$ antibiotic courses, 21% hospitalized for acute RTI; older siblings increased risk of recurrent RTI |

|          |    |             |                                                                                         |                         |       |                                |                       |                                                                                                                                                                    |                                                                                                                                                                                                                                                                             |
|----------|----|-------------|-----------------------------------------------------------------------------------------|-------------------------|-------|--------------------------------|-----------------------|--------------------------------------------------------------------------------------------------------------------------------------------------------------------|-----------------------------------------------------------------------------------------------------------------------------------------------------------------------------------------------------------------------------------------------------------------------------|
| 27228308 | 26 | Australia   | Large city, ORChID birth cohort                                                         | 2010-2014               | 2 yrs | 0-2 yrs                        | 154                   | Daily diary cards, mailed collectively end of each month, separate burden diary for impact of more severe episodes (88,032 childdays of observation)               | 2/3 1 <sup>st</sup> born, 1/2 from advantaged families; resp symptoms 20% of day, mean 13 episodes in 1 <sup>st</sup> 2 yrs of life; doctor visit in 28%, antibiotics in 13% of episodes; main symptoms nasal congestion/ discharge and cough, fever and wheeze less common |
| 28137317 | 27 | Sweden      | Age-stratified random sampling from the population registry                             | 2013-2014               | 1 yr  | all ages (children and adults) | 3245                  | Weekly questionnaires, follow-up questionnaire in case of symptoms (all online by email) (childweeks of observation not explicitly described)                      | Focus on symptoms fitting acute gastrointestinal illness, acute respiratory illness and influenza-like illness episodes                                                                                                                                                     |
| 30208077 | 28 | Switzerland | Large city, maternity hospitals & obstetrician's practices, BILD birth cohort           | 2015                    | 1 yr  | 0-12 ms                        | 487                   | Interview on history in 1 <sup>st</sup> ms, weekly telephone interview on respiratory symptoms and infections (childweeks of observation not explicitly described) | No association between quintiles of neighborhood child density or interaction with older siblings and number of respiratory symptoms                                                                                                                                        |
| 29712621 | 29 | UK          | Registration of Royal College of General Practitioners Research and Surveillance Centre | 4 May 2015 - 8 May 2016 | 1 yr  | 0-24 yrs                       | 155 general practices | Retrospective review of structured diagnosis codes related to doctor visits in the electronic patient file system                                                  | Boys up to 15 yrs presented more with LRTI (mainly acute bronchitis), and boys 5-14 yrs more with allergic rhinitis and asthma than girls                                                                                                                                   |

|          |    |    |                                                                               |      |                                                 |          |                              |                                                                                                                                         |                                                      |
|----------|----|----|-------------------------------------------------------------------------------|------|-------------------------------------------------|----------|------------------------------|-----------------------------------------------------------------------------------------------------------------------------------------|------------------------------------------------------|
| 30670390 | 30 | UK | Large city and surrounding 10-mile area, recruitment by GPs in their practice | 2016 | Up to and including 1 <sup>st</sup> RTI episode | children | 485 children in 331 families | Weekly online question (RTI?), if yes, daily questionnaire until symptoms resolved (childweeks of observation not explicitly described) | RTI symptoms lasted up to 3 weeks in 90% of children |
|----------|----|----|-------------------------------------------------------------------------------|------|-------------------------------------------------|----------|------------------------------|-----------------------------------------------------------------------------------------------------------------------------------------|------------------------------------------------------|

<sup>1</sup>PMID = the unique identifier number used in PubMed. <sup>2</sup>Ref = literature reference number in the paper. Extensive PubMed search plus ('respiratory symptoms' and 'children'; snowball method; only studies that did not preselect the cohort for specific risk factors or focused on predictors that are generally not known in the real-life day-to-day situation in the first lines of care were included. AOM = acute otitis media, ED = emergency department, FU = follow-up, GP = general practitioner, (L)RTI(s) = (lower) respiratory tract infection(s), ms = months, n.a. = not applicable, OR = odds ratio, p = percentile, pos = positive, resp = respiratory, wks = weeks, yr(s) = year(s).
