# Supplementary material for: Respiratory Symptoms in Post-infancy Children. A Dutch Pediatric Cohort Study
Source: PubMed Central journal article supplement (PMC7773946; doi:10.3389/fped.2020.583630), 2020-12-17
Supplement: Table_2.pdf [file Table_2.pdf]

**Supplementary Table 2. Online questionnaire\***

| <b>Questionnaire at the start of the study</b>                                         |                                                                                                                                                                                    |
|----------------------------------------------------------------------------------------|------------------------------------------------------------------------------------------------------------------------------------------------------------------------------------|
| Date of birth                                                                          | dd/mm/yyyy                                                                                                                                                                         |
| Gender                                                                                 | male / female                                                                                                                                                                      |
| First 2 digits of postal code                                                          | <i>(Dutch postal codes contain 4 digits followed by 2 letters; the first 2 digits define the geographical area, but give no clue to the exact address)</i>                         |
| Ethnicity                                                                              | Original Dutch / Surinam / Netherlands Antilles / Indonesian / Moluccan / Moroccan / Turkish / Other Asian / Other African / Latino / Mixed / I prefer not to answer this question |
| Allergy, asthma or eczema in the family?                                               | no / yes / don't know                                                                                                                                                              |
| Frequent infections in the family?                                                     | no / yes / don't know                                                                                                                                                              |
| Smoking in the home?                                                                   | no / no, only outside / yes, but only by visitors / yes, by family members                                                                                                         |
| <b>Weekly questionnaire (weeks 1-104)</b>                                              |                                                                                                                                                                                    |
| Did your child have any complaints last week?                                          | no / yes                                                                                                                                                                           |
| <i>If no: end of questionnaire for that week. If yes: the questions below followed</i> |                                                                                                                                                                                    |
| Did you visit a doctor (please tick applicable items)?                                 | no / yes, general practitioner / yes, paediatrician / yes, ENT-specialist / yes, other                                                                                             |
| Did your child get antibiotics?                                                        | no / yes                                                                                                                                                                           |
| What were the complaints (please tick applicable items)?                               | earache / ear discharge / throat ache / blocked nose / runny nose / headache / hoarse voice / cough / dyspnoea                                                                     |
| Was there a fever $\geq 38.5^{\circ}\text{C}$ ?                                        | no / yes / didn't take the temperature                                                                                                                                             |
| Did the child miss school?                                                             | no / yes / not applicable                                                                                                                                                          |
| Did the child miss study work placement ('stage' in Dutch)?                            | no / yes / not applicable                                                                                                                                                          |
| Did the child miss work?                                                               | no / yes / not applicable                                                                                                                                                          |
| Did the parents miss their work?                                                       | no / yes / not applicable                                                                                                                                                          |

\*Original questionnaires *in Dutch*. Population cohort is explained in the methods section of the manuscript. ENT = ear-nose-throat.
