# Supplementary material for: Respiratory Symptoms in Post-infancy Children. A Dutch Pediatric Cohort Study
Source: PubMed Central journal article supplement (PMC7773946; doi:10.3389/fped.2020.583630), 2020-12-17
Supplement: Table_3.pdf [file Table_3.pdf]

**Supplementary Table 3. Duration of episodes of consecutive childweeks with symptoms in the cohort, counted per individual child.**

| total consecutive episodes with <i>any symptom</i> lasting: | in all children together | children <5 years (n=247) | children 5-10 years (n=281) | children ≥10 years (n=227) | total consecutive episodes with <i>cough</i> lasting:    | in all children together | children <5 years (n=247) | children 5-10 years (n=281) | children ≥10 years (n=227) |
|-------------------------------------------------------------|--------------------------|---------------------------|-----------------------------|----------------------------|----------------------------------------------------------|--------------------------|---------------------------|-----------------------------|----------------------------|
| 1 week                                                      | 3770                     | 1100                      | 1700                        | 970                        | 1 week                                                   | 1468                     | 712                       | 424                         | 332                        |
| 2 weeks                                                     | 1057                     | 669                       | 112                         | 276                        | 2 weeks                                                  | 602                      | 344                       | 158                         | 100                        |
| 3 weeks                                                     | 291                      | 167                       | 70                          | 54                         | 3 weeks                                                  | 120                      | 69                        | 30                          | 21                         |
| 4 weeks                                                     | 131                      | 63                        | 42                          | 26                         | 4 weeks                                                  | 56                       | 31                        | 13                          | 12                         |
| 5 weeks                                                     | 62                       | 35                        | 17                          | 10                         | 5 weeks                                                  | 32                       | 23                        | 9                           | 0                          |
| 6 weeks                                                     | 39                       | 23                        | 11                          | 5                          | 6 weeks                                                  | 12                       | 9                         | 2                           | 1                          |
| 7 weeks                                                     | 23                       | 15                        | 7                           | 1                          | 7 weeks                                                  | 8                        | 5                         | 3                           | 0                          |
| 8 weeks                                                     | 12                       | 6                         | 4                           | 2                          | 8 weeks                                                  | 3                        | 2                         | 0                           | 1                          |
| 9 weeks                                                     | 7                        | 4                         | 2                           | 1                          | 9 weeks                                                  | 1                        | 1                         | 0                           | 0                          |
| 10 weeks                                                    | 7                        | 5                         | 2                           | 0                          | 10 weeks                                                 | 2                        | 1                         | 1                           | 0                          |
| 11 weeks                                                    | 4                        | 2                         | 1                           | 1                          | 11 weeks                                                 | 0                        | 0                         | 0                           | 0                          |
| 12 weeks                                                    | 2                        | 2                         | 0                           | 0                          | 12 weeks                                                 | 0                        | 0                         | 0                           | 0                          |
| 13 weeks                                                    | 0                        | 0                         | 0                           | 0                          | 13 weeks                                                 | 0                        | 0                         | 0                           | 0                          |
| 14 weeks                                                    | 2                        | 2                         | 0                           | 0                          | 14 weeks                                                 | 0                        | 0                         | 0                           | 0                          |
| 15 weeks                                                    | 0                        | 0                         | 0                           | 0                          | 15 weeks                                                 | 0                        | 0                         | 0                           | 0                          |
| 16 weeks                                                    | 2                        | 2                         | 0                           | 0                          | 16 weeks                                                 | 1                        | 1                         | 0                           | 0                          |
| 17 weeks                                                    | 0                        | 0                         | 0                           | 0                          | 17 weeks                                                 | 0                        | 0                         | 0                           | 0                          |
| 20 weeks                                                    | 1                        | 1                         | 0                           | 0                          | 20 weeks                                                 | 0                        | 0                         | 0                           | 0                          |
| 21 weeks                                                    | 0                        | 0                         | 0                           | 0                          | 21 weeks                                                 | 0                        | 0                         | 0                           | 0                          |
| 22 weeks                                                    | 0                        | 0                         | 0                           | 0                          | 22 weeks                                                 | 0                        | 0                         | 0                           | 0                          |
| 62 weeks                                                    | 1                        | 0                         | 1                           | 0                          | 62 weeks                                                 | 0                        | 0                         | 0                           | 0                          |
| total consecutive episodes with <i>runny nose</i> lasting:  | in all children together | children <5 years (n=247) | children 5-10 years (n=281) | children ≥10 years (n=227) | total consecutive episodes with <i>headache</i> lasting: | in all children together | children <5 years (n=247) | children 5-10 years (n=281) | children ≥10 years (n=227) |

|                                                              |                          |                           |                             |                            |                                                             |                          |                           |                             |                            |
|--------------------------------------------------------------|--------------------------|---------------------------|-----------------------------|----------------------------|-------------------------------------------------------------|--------------------------|---------------------------|-----------------------------|----------------------------|
| 1 week                                                       | 986                      | 528                       | 221                         | 237                        | 1 week                                                      | 1260                     | 246                       | 455                         | 511                        |
| 2 weeks                                                      | 357                      | 233                       | 77                          | 47                         | 2 weeks                                                     | 154                      | 49                        | 56                          | 73                         |
| 3 weeks                                                      | 68                       | 48                        | 13                          | 7                          | 3 weeks                                                     | 25                       | 10                        | 3                           | 12                         |
| 4 weeks                                                      | 29                       | 21                        | 5                           | 3                          | 4 weeks                                                     | 7                        | 2                         | 4                           | 1                          |
| 5 weeks                                                      | 13                       | 11                        | 1                           | 1                          | 5 weeks                                                     | 2                        | 0                         | 2                           | 0                          |
| 6 weeks                                                      | 9                        | 7                         | 2                           | 0                          | 6 weeks                                                     | 1                        | 0                         | 1                           | 0                          |
| 7 weeks                                                      | 2                        | 1                         | 1                           | 0                          | 7 weeks                                                     | 4                        | 1                         | 3                           | 0                          |
| 8 weeks                                                      | 3                        | 3                         | 0                           | 0                          | 8 weeks                                                     | 0                        | 0                         | 0                           | 0                          |
| 9 weeks                                                      | 2                        | 2                         | 0                           | 0                          | 9 weeks                                                     | 2                        | 0                         | 1                           | 1                          |
| 10 weeks                                                     | 1                        | 1                         | 0                           | 0                          | 10 weeks                                                    | 0                        | 0                         | 0                           | 0                          |
| 11 weeks                                                     | 0                        | 0                         | 0                           | 0                          | 11 weeks                                                    | 0                        | 0                         | 0                           | 0                          |
| 12 weeks                                                     | 0                        | 0                         | 0                           | 0                          | 12 weeks                                                    | 1                        | 0                         | 1                           | 0                          |
| 13 weeks                                                     | 0                        | 0                         | 0                           | 0                          | 13 weeks                                                    | 0                        | 0                         | 0                           | 0                          |
| 14 weeks                                                     | 0                        | 0                         | 0                           | 0                          | 14 weeks                                                    | 0                        | 0                         | 0                           | 0                          |
| 15 weeks                                                     | 0                        | 0                         | 0                           | 0                          | 15 weeks                                                    | 0                        | 0                         | 0                           | 0                          |
| 16 weeks                                                     | 0                        | 0                         | 0                           | 0                          | 16 weeks                                                    | 1                        | 0                         | 1                           | 0                          |
| 17 weeks                                                     | 0                        | 0                         | 0                           | 0                          | 17 weeks                                                    | 0                        | 0                         | 0                           | 0                          |
| 20 weeks                                                     | 1                        | 1                         | 0                           | 0                          | 20 weeks                                                    | 0                        | 0                         | 0                           | 0                          |
| 21 weeks                                                     | 0                        | 0                         | 0                           | 0                          | 21 weeks                                                    | 0                        | 0                         | 0                           | 0                          |
| 22 weeks                                                     | 0                        | 0                         | 0                           | 0                          | 22 weeks                                                    | 1                        | 0                         | 1                           | 0                          |
| 62 weeks                                                     | 0                        | 0                         | 0                           | 0                          | 62 weeks                                                    | 0                        | 0                         | 0                           | 0                          |
| total consecutive episodes with <i>blocked nose</i> lasting: | in all children together | children <5 years (n=247) | children 5-10 years (n=281) | children ≥10 years (n=227) | total consecutive episodes with <i>throat ache</i> lasting: | in all children together | children <5 years (n=247) | children 5-10 years (n=281) | children ≥10 years (n=227) |
| 1 week                                                       | 1345                     | 593                       | 349                         | 403                        | 1 week                                                      | 1209                     | 395                       | 394                         | 420                        |
| 2 weeks                                                      | 452                      | 221                       | 144                         | 87                         | 2 weeks                                                     | 251                      | 104                       | 66                          | 81                         |
| 3 weeks                                                      | 81                       | 34                        | 37                          | 10                         | 3 weeks                                                     | 39                       | 17                        | 12                          | 10                         |
| 4 weeks                                                      | 24                       | 15                        | 8                           | 1                          | 4 weeks                                                     | 11                       | 1                         | 7                           | 3                          |
| 5 weeks                                                      | 11                       | 6                         | 5                           | 0                          | 5 weeks                                                     | 6                        | 4                         | 0                           | 2                          |
| 6 weeks                                                      | 10                       | 4                         | 6                           | 0                          | 6 weeks                                                     | 2                        | 1                         | 0                           | 1                          |
| 7 weeks                                                      | 4                        | 2                         | 2                           | 0                          | 7 weeks                                                     | 0                        | 0                         | 0                           | 0                          |

|                                                         |                          |                           |                             |                            |                                                               |                          |                           |                             |                            |
|---------------------------------------------------------|--------------------------|---------------------------|-----------------------------|----------------------------|---------------------------------------------------------------|--------------------------|---------------------------|-----------------------------|----------------------------|
| 8 weeks                                                 | 2                        | 2                         | 0                           | 0                          | 8 weeks                                                       | 0                        | 0                         | 0                           | 0                          |
| 9 weeks                                                 | 2                        | 2                         | 0                           | 0                          | 9 weeks                                                       | 0                        | 0                         | 0                           | 0                          |
| 10 weeks                                                | 0                        | 0                         | 0                           | 0                          | 10 weeks                                                      | 0                        | 0                         | 0                           | 0                          |
| 11 weeks                                                | 1                        | 1                         | 0                           | 0                          | 11 weeks                                                      | 0                        | 0                         | 0                           | 0                          |
| 12 weeks                                                | 0                        | 0                         | 0                           | 0                          | 12 weeks                                                      | 0                        | 0                         | 0                           | 0                          |
| 13 weeks                                                | 0                        | 0                         | 0                           | 0                          | 13 weeks                                                      | 0                        | 0                         | 0                           | 0                          |
| 14 weeks                                                | 0                        | 0                         | 0                           | 0                          | 14 weeks                                                      | 0                        | 0                         | 0                           | 0                          |
| 15 weeks                                                | 0                        | 0                         | 0                           | 0                          | 15 weeks                                                      | 0                        | 0                         | 0                           | 0                          |
| 16 weeks                                                | 0                        | 0                         | 0                           | 0                          | 16 weeks                                                      | 0                        | 0                         | 0                           | 0                          |
| 17 weeks                                                | 0                        | 0                         | 0                           | 0                          | 17 weeks                                                      | 0                        | 0                         | 0                           | 0                          |
| 20 weeks                                                | 0                        | 0                         | 0                           | 0                          | 20 weeks                                                      | 0                        | 0                         | 0                           | 0                          |
| 21 weeks                                                | 0                        | 0                         | 0                           | 0                          | 21 weeks                                                      | 0                        | 0                         | 0                           | 0                          |
| 22 weeks                                                | 0                        | 0                         | 0                           | 0                          | 22 weeks                                                      | 0                        | 0                         | 0                           | 0                          |
| 62 weeks                                                | 0                        | 0                         | 0                           | 0                          | 62 weeks                                                      | 0                        | 0                         | 0                           | 0                          |
| total consecutive episodes with <i>earache</i> lasting: | in all children together | children <5 years (n=247) | children 5-10 years (n=281) | children ≥10 years (n=227) | total consecutive episodes with <i>ear discharge</i> lasting: | in all children together | children <5 years (n=247) | children 5-10 years (n=281) | children ≥10 years (n=227) |
| 1 week                                                  | 422                      | 229                       | 128                         | 65                         | 1 week                                                        | 90                       | 52                        | 26                          | 12                         |
| 2 weeks                                                 | 101                      | 58                        | 29                          | 14                         | 2 weeks                                                       | 30                       | 16                        | 13                          | 1                          |
| 3 weeks                                                 | 17                       | 8                         | 7                           | 2                          | 3 weeks                                                       | 7                        | 4                         | 3                           | 0                          |
| 4 weeks                                                 | 9                        | 4                         | 5                           | 0                          | 4 weeks                                                       | 3                        | 1                         | 2                           | 0                          |
| 5 weeks                                                 | 3                        | 1                         | 1                           | 1                          | 5 weeks                                                       | 1                        | 1                         | 0                           | 0                          |
| 6 weeks                                                 | 1                        | 1                         | 0                           | 0                          | 6 weeks                                                       | 0                        | 0                         | 0                           | 0                          |
| 7 weeks                                                 | 1                        | 1                         | 0                           | 0                          | 7 weeks                                                       | 0                        | 0                         | 0                           | 0                          |
| 8 weeks                                                 | 0                        | 0                         | 0                           | 0                          | 8 weeks                                                       | 0                        | 0                         | 0                           | 0                          |
| 9 weeks                                                 | 0                        | 0                         | 0                           | 0                          | 9 weeks                                                       | 0                        | 0                         | 0                           | 0                          |
| 10 weeks                                                | 0                        | 0                         | 0                           | 0                          | 10 weeks                                                      | 0                        | 0                         | 0                           | 0                          |
| 11 weeks                                                | 0                        | 0                         | 0                           | 0                          | 11 weeks                                                      | 0                        | 0                         | 0                           | 0                          |
| 12 weeks                                                | 0                        | 0                         | 0                           | 0                          | 12 weeks                                                      | 0                        | 0                         | 0                           | 0                          |
| 13 weeks                                                | 0                        | 0                         | 0                           | 0                          | 13 weeks                                                      | 0                        | 0                         | 0                           | 0                          |
| 14 weeks                                                | 0                        | 0                         | 0                           | 0                          | 14 weeks                                                      | 0                        | 0                         | 0                           | 0                          |

|                                                         |                          |                           |                             |                            |                                                              |                          |                           |                             |                            |
|---------------------------------------------------------|--------------------------|---------------------------|-----------------------------|----------------------------|--------------------------------------------------------------|--------------------------|---------------------------|-----------------------------|----------------------------|
| 15 weeks                                                | 0                        | 0                         | 0                           | 0                          | 15 weeks                                                     | 0                        | 0                         | 0                           | 0                          |
| 16 weeks                                                | 0                        | 0                         | 0                           | 0                          | 16 weeks                                                     | 0                        | 0                         | 0                           | 0                          |
| 17 weeks                                                | 0                        | 0                         | 0                           | 0                          | 17 weeks                                                     | 0                        | 0                         | 0                           | 0                          |
| 20 weeks                                                | 0                        | 0                         | 0                           | 0                          | 20 weeks                                                     | 0                        | 0                         | 0                           | 0                          |
| 21 weeks                                                | 0                        | 0                         | 0                           | 0                          | 21 weeks                                                     | 0                        | 0                         | 0                           | 0                          |
| 22 weeks                                                | 0                        | 0                         | 0                           | 0                          | 22 weeks                                                     | 0                        | 0                         | 0                           | 0                          |
| 62 weeks                                                | 0                        | 0                         | 0                           | 0                          | 62 weeks                                                     | 0                        | 0                         | 0                           | 0                          |
| total consecutive episodes with <i>dyspnea</i> lasting: | in all children together | children <5 years (n=247) | children 5-10 years (n=281) | children ≥10 years (n=227) | total consecutive episodes with <i>hoarse voice</i> lasting: | in all children together | children <5 years (n=247) | children 5-10 years (n=281) | children ≥10 years (n=227) |
| 1 week                                                  | 273                      | 122                       | 82                          | 63                         | 1 week                                                       | 497                      | 213                       | 138                         | 146                        |
| 2 weeks                                                 | 38                       | 22                        | 12                          | 8                          | 2 weeks                                                      | 93                       | 39                        | 23                          | 31                         |
| 3 weeks                                                 | 9                        | 3                         | 5                           | 1                          | 3 weeks                                                      | 15                       | 8                         | 5                           | 2                          |
| 4 weeks                                                 | 3                        | 0                         | 3                           | 0                          | 4 weeks                                                      | 2                        | 1                         | 1                           | 0                          |
| 5 weeks                                                 | 1                        | 0                         | 1                           | 0                          | 5 weeks                                                      | 2                        | 0                         | 0                           | 2                          |
| 6 weeks                                                 | 0                        | 0                         | 0                           | 0                          | 6 weeks                                                      | 0                        | 0                         | 0                           | 0                          |
| 7 weeks                                                 | 1                        | 0                         | 1                           | 0                          | 7 weeks                                                      | 0                        | 0                         | 0                           | 0                          |
| 8 weeks                                                 | 0                        | 0                         | 0                           | 0                          | 8 weeks                                                      | 0                        | 0                         | 0                           | 0                          |
| 9 weeks                                                 | 0                        | 0                         | 0                           | 0                          | 9 weeks                                                      | 0                        | 0                         | 0                           | 0                          |
| 10 weeks                                                | 0                        | 0                         | 0                           | 0                          | 10 weeks                                                     | 0                        | 0                         | 0                           | 0                          |
| 11 weeks                                                | 0                        | 0                         | 0                           | 0                          | 11 weeks                                                     | 0                        | 0                         | 0                           | 0                          |
| 12 weeks                                                | 0                        | 0                         | 0                           | 0                          | 12 weeks                                                     | 0                        | 0                         | 0                           | 0                          |
| 13 weeks                                                | 0                        | 0                         | 0                           | 0                          | 13 weeks                                                     | 0                        | 0                         | 0                           | 0                          |
| 14 weeks                                                | 0                        | 0                         | 0                           | 0                          | 14 weeks                                                     | 0                        | 0                         | 0                           | 0                          |
| 15 weeks                                                | 0                        | 0                         | 0                           | 0                          | 15 weeks                                                     | 0                        | 0                         | 0                           | 0                          |
| 16 weeks                                                | 0                        | 0                         | 0                           | 0                          | 16 weeks                                                     | 0                        | 0                         | 0                           | 0                          |
| 17 weeks                                                | 0                        | 0                         | 0                           | 0                          | 17 weeks                                                     | 0                        | 0                         | 0                           | 0                          |
| 20 weeks                                                | 0                        | 0                         | 0                           | 0                          | 20 weeks                                                     | 0                        | 0                         | 0                           | 0                          |
| 21 weeks                                                | 0                        | 0                         | 2                           | 0                          | 21 weeks                                                     | 0                        | 0                         | 0                           | 0                          |
| 22 weeks                                                | 2                        | 0                         | 0                           | 0                          | 22 weeks                                                     | 0                        | 0                         | 0                           | 0                          |
| 62 weeks                                                | 0                        | 0                         | 0                           | 0                          | 62 weeks                                                     | 0                        | 0                         | 0                           | 0                          |

| total consecutive episodes with <i>fever</i> lasting: | in all children together | children <5 years (n=247) | children 5-10 years (n=281) | children ≥10 years (n=227) |  |  |  |  |  |
|-------------------------------------------------------|--------------------------|---------------------------|-----------------------------|----------------------------|--|--|--|--|--|
| 1 week                                                | 812                      | 489                       | 241                         | 82                         |  |  |  |  |  |
| 2 weeks                                               | 142                      | 94                        | 38                          | 10                         |  |  |  |  |  |
| 3 weeks                                               | 13                       | 7                         | 5                           | 1                          |  |  |  |  |  |
| 4 weeks                                               | 1                        | 1                         | 0                           | 0                          |  |  |  |  |  |
| 5 weeks                                               | 2                        | 1                         | 1                           | 0                          |  |  |  |  |  |
| 6 weeks                                               | 0                        | 0                         | 0                           | 0                          |  |  |  |  |  |
| 7 weeks                                               | 0                        | 0                         | 0                           | 0                          |  |  |  |  |  |
| 8 weeks                                               | 0                        | 0                         | 0                           | 0                          |  |  |  |  |  |
| 9 weeks                                               | 0                        | 0                         | 0                           | 0                          |  |  |  |  |  |
| 10 weeks                                              | 0                        | 0                         | 0                           | 0                          |  |  |  |  |  |
| 11 weeks                                              | 0                        | 0                         | 0                           | 0                          |  |  |  |  |  |
| 12 weeks                                              | 0                        | 0                         | 0                           | 0                          |  |  |  |  |  |
| 13 weeks                                              | 0                        | 0                         | 0                           | 0                          |  |  |  |  |  |
| 14 weeks                                              | 0                        | 0                         | 0                           | 0                          |  |  |  |  |  |
| 15 weeks                                              | 0                        | 0                         | 0                           | 0                          |  |  |  |  |  |
| 16 weeks                                              | 0                        | 0                         | 0                           | 0                          |  |  |  |  |  |
| 17 weeks                                              | 0                        | 0                         | 0                           | 0                          |  |  |  |  |  |
| 20 weeks                                              | 0                        | 0                         | 0                           | 0                          |  |  |  |  |  |
| 21 weeks                                              | 0                        | 0                         | 0                           | 0                          |  |  |  |  |  |
| 22 weeks                                              | 0                        | 0                         | 0                           | 0                          |  |  |  |  |  |
| 62 weeks                                              | 0                        | 0                         | 0                           | 0                          |  |  |  |  |  |

This table shows aggregated data (all childweeks of all children). Total reported childweeks  $n = 55,524$  of which 8,425 with complaint(s). In this table, episodes preceded and/or followed by a missing value (week not reported;  $n = 6,194$ ) were included in the count as if the missing value was ‘no symptoms in that week’. So, in reality the curves of episode duration are shifted slightly towards longer episodes, leading to some underestimation of the duration of symptom blocks. However, this is only a small bias. In comparison, the children with full participation (104 reported childweeks) reported a total of 570, 191, 58, 30, 14, 14, and 13 consecutive episodes of 1, 2, 3, 4, 5, 6, and 7 or more consecutive childweeks with *any symptoms*, respectively, with a weak contingency coefficient (0.053; chi-square, one-sided,  $p=.012$ ).
